# Supplementary material for: Effects of Chemotherapy on Hematological Parameters and CD4+/CD8+ Ratio in Cats with Mediastinal Lymphoma and Seropositive to Feline Leukemia Virus
Source: MDPI journal article supplement (doi:10.3390/ani12030223), 2022-01-18
Supplement: s1 [file s1]

**Table S1.** Individual leukogram of the 18 mediastinal lymphoma cats in the study. ID, identification of each cat at 4 times. WBC, white blood cell count (reference range 5.5-19.0 x 10<sup>3</sup> cells/ $\mu$ L). Neu, segmented neutrophil count (reference range 2.5-12.5 x10<sup>3</sup> cells/ $\mu$ L). Lym, lymphocyte count (reference range 1.5-7.0 x10<sup>3</sup> cells/ $\mu$ L).

| ID | WBCx10 <sup>3</sup>     |                         |                         |                         | Neu x10 <sup>3</sup>    |                         |                         |                         | Lym x10 <sup>3</sup>    |                         |                         |                         | CD4+/CD8+ ratio         |                         |                         |                         | Survival time (days) |
|----|-------------------------|-------------------------|-------------------------|-------------------------|-------------------------|-------------------------|-------------------------|-------------------------|-------------------------|-------------------------|-------------------------|-------------------------|-------------------------|-------------------------|-------------------------|-------------------------|----------------------|
|    | 1 <sup>st</sup><br>week | 2 <sup>nd</sup><br>week | 3 <sup>rd</sup><br>week | 4 <sup>th</sup><br>week | 1 <sup>st</sup><br>week | 2 <sup>nd</sup><br>week | 3 <sup>rd</sup><br>week | 4 <sup>th</sup><br>week | 1 <sup>st</sup><br>week | 2 <sup>nd</sup><br>week | 3 <sup>rd</sup><br>week | 4 <sup>th</sup><br>week | 1 <sup>st</sup><br>week | 2 <sup>nd</sup><br>week | 3 <sup>rd</sup><br>week | 4 <sup>th</sup><br>week |                      |
| 1  | 24.8                    | 15.3                    | 10.3                    | 11                      | 16.86                   | 8.87                    | 8.86                    | 10.78                   | 4.71                    | 6.27                    | 1.44                    | 0.11                    | 0.13                    | 0.32                    | 0.46                    | 1                       | 34                   |
| 2  | 16.1                    | 11.5                    | 14.5                    | 16.9                    | 12.40                   | 10.24                   | 11.89                   | 14.87                   | 1.93                    | 0.46                    | 0.87                    | 0.68                    | 0.5                     | 1                       | 1                       | 5.5                     | alive                |
| 3  | 12.7                    | 9.01                    | 4.63                    | 6.67                    | 10.03                   | 6.85                    | 2.36                    | 6.00                    | 1.27                    | 1.89                    | 2.04                    | 0.67                    | 1.24                    | 1                       | 2.22                    | 1                       | alive                |
| 4  | 21.42                   | 3.67                    | 4.86                    | 12                      | 1.29                    | 1.47                    | 3.69                    | 9.72                    | 2.57                    | 0.04                    | 1.07                    | 1.92                    | 0.56                    | 1.76                    | 1.2                     | 1                       | alive                |
| 5  | 18.9                    | 12                      | 11.1                    | 8.21                    | 16.07                   | 7.20                    | 6.44                    | 6.57                    | 1.70                    | 3.24                    | 4.00                    | 0.99                    | 0.83                    | 0.73                    | 0.82                    | 0.34                    | alive                |
| 6  | 20.9                    | 7.79                    | 6.31                    | 8.2                     | 8.78                    | 4.83                    | 2.84                    | 3.28                    | 9.41                    | 2.49                    | 3.41                    | 4.35                    | 1.08                    | 0.94                    | 1.1                     | 1.33                    | alive                |
| 7  | 24.41                   | 4.16                    | 8.2                     | 4.04                    | 13.23                   | 1.91                    | 6.23                    | 2.79                    | 7.86                    | 1.87                    | 1.80                    | 1.13                    | 6.16                    | 0.75                    | 1.36                    | 0.47                    | 61                   |
| 8  | 12.4                    | 11.5                    | 6.54                    | 12.1                    | 9.80                    | 7.71                    | 3.47                    | 8.47                    | 2.23                    | 3.22                    | 3.07                    | 2.78                    | 1                       | 1                       | 1.3                     | 1.3                     | alive                |
| 9  | 19.4                    | 12.2                    | 7.3                     | 9.36                    | 13.58                   | 10.74                   | 5.26                    | 6.74                    | 2.52                    | 1.22                    | 1.61                    | 1.97                    | 0.59                    | 4.17                    | 0.61                    | 0.4                     | alive                |
| 10 | 8                       | 7.19                    | 3.73                    | 10.9                    | 6.32                    | 3.60                    | 2.42                    | 7.19                    | 1.44                    | 3.38                    | 1.04                    | 3.38                    | 1.06                    | 0.77                    | 0.72                    | 0.79                    | 45                   |
| 11 | 13.9                    | 19.2                    | 9.69                    | 15.7                    | 11.82                   | 14.59                   | 4.85                    | 9.42                    | 1.11                    | 3.07                    | 3.39                    | 5.02                    | 1.52                    | 2.02                    | 1.03                    | 1.06                    | 113                  |
| 12 | 17.4                    | 8.09                    | 20.8                    | 17.8                    | 13.75                   | 5.02                    | 16.85                   | 15.66                   | 3.31                    | 2.51                    | 2.70                    | 1.42                    | 2.48                    | 2.53                    | 2.57                    | 2.4                     | alive                |
| 13 | 12.1                    | 6.44                    | 4.64                    | 6.61                    | 9.56                    | 4.38                    | 3.02                    | 6.02                    | 2.30                    | 1.87                    | 1.53                    | 0.53                    | 0.94                    | 0.88                    | 0.55                    | 0.62                    | 134                  |
| 14 | 10.4                    | 5.51                    | 4.19                    | 3.08                    | 8.63                    | 4.68                    | 2.93                    | 1.85                    | 1.46                    | 0.72                    | 0.92                    | 0.77                    | 1.04                    | 1.05                    | 1.25                    | 0.92                    | alive                |
| 15 | 29                      | 7.76                    | 6.55                    | 9.74                    | 23.20                   | 6.21                    | 5.50                    | 8.28                    | 2.32                    | 1.16                    | 0.98                    | 1.07                    | 1.92                    | 1.71                    | 1.24                    | 1.32                    | alive                |
| 16 | 20.3                    | 10.4                    | 5.35                    | 7.62                    | 15.02                   | 9.57                    | 3.75                    | 6.10                    | 4.26                    | 0.83                    | 1.12                    | 1.30                    | 1.64                    | 1.94                    | 1.82                    | 1.63                    | alive                |
| 17 | 15.4                    | 4.46                    | 8.46                    | 5.22                    | 12.32                   | 1.92                    | 3.55                    | 3.24                    | 1.39                    | 2.19                    | 4.31                    | 1.83                    | 0.63                    | 1.41                    | 0.78                    | 0.94                    | alive                |
| 18 | 12.7                    | 10.2                    | 5.93                    | 6.69                    | 9.91                    | 7.85                    | 4.92                    | 5.75                    | 1.02                    | 0.92                    | 0.59                    | 0.67                    | 0.77                    | 0.45                    | 0.45                    | 0.53                    | alive                |

**Table S2.** Individual hemogram of the 18 mediastinal lymphoma cats in the study. ID, identification of each cat at 4 times. PCV, packed cell volume (reference range 30-45%), MCV, mean corpuscular volume (reference range 39-55 fl) and MCHC, mean corpuscular hemoglobin concentration (reference range 30-36 gm%).

| ID | PCV                  |                      |                      |                      | MCV                  |                      |                      |                      | MCHC                 |                      |                      |                      |
|----|----------------------|----------------------|----------------------|----------------------|----------------------|----------------------|----------------------|----------------------|----------------------|----------------------|----------------------|----------------------|
|    | 1 <sup>st</sup> week | 2 <sup>nd</sup> week | 3 <sup>rd</sup> week | 4 <sup>th</sup> week | 1 <sup>st</sup> week | 2 <sup>nd</sup> week | 3 <sup>rd</sup> week | 4 <sup>th</sup> week | 1 <sup>st</sup> week | 2 <sup>nd</sup> week | 3 <sup>rd</sup> week | 4 <sup>th</sup> week |
| 1  | 40.3                 | 41.1                 | 39.7                 | 32.9                 | 42.2                 | 43.22                | 44.31                | 46.53                | 33.5                 | 30.17                | 31.74                | 32.22                |
| 2  | 31.6                 | 22.1                 | 24.1                 | 21.1                 | 57.45                | 57.11                | 56.18                | 55.09                | 28.77                | 30.18                | 29.17                | 33.98                |
| 3  | 45.4                 | 37.9                 | 38                   | 35.7                 | 50.67                | 51.85                | 51.7                 | 51.66                | 31.5                 | 31.66                | 30.26                | 32.21                |
| 4  | 31.5                 | 28.8                 | 27.6                 | 29.2                 | 45.5                 | 45.57                | 45.47                | 47.33                | 32.1                 | 32.08                | 31.27                | 30.99                |
| 5  | 28.2                 | 26.5                 | 28.4                 | 27.5                 | 50.09                | 48.01                | 50.44                | 50.46                | 32.2                 | 33.4                 | 31.69                | 34.15                |
| 6  | 34.3                 | 33.8                 | 32.8                 | 37.4                 | 44.78                | 47.41                | 47.95                | 49.34                | 32.36                | 31.95                | 31.71                | 28.34                |
| 7  | 34.2                 | 27.8                 | 26.9                 | 28.4                 | 49.9                 | 55.27                | 55.58                | 57.61                | 33                   | 31.62                | 31.97                | 30.49                |
| 8  | 26.9                 | 26.1                 | 30                   | 33.3                 | 48.04                | 48.33                | 48.08                | 48.4                 | 30.97                | 30.34                | 30.33                | 30.33                |
| 9  | 43.1                 | 37.5                 | 38.4                 | 37.1                 | 48.98                | 49.41                | 52.32                | 50.96                | 35.5                 | 33.87                | 34.11                | 34.77                |
| 10 | 50.1                 | 37.2                 | 34.4                 | 37.1                 | 51.81                | 52.47                | 54.43                | 54.8                 | 32.53                | 33.06                | 31.98                | 32.08                |
| 11 | 40.2                 | 33.5                 | 33.3                 | 31.3                 | 48.26                | 44.25                | 45.43                | 46.65                | 29.1                 | 32.54                | 30                   | 29.94                |
| 12 | 39                   | 32.8                 | 29.4                 | 31.2                 | 50.52                | 49.77                | 50.78                | 51.49                | 33.08                | 31.4                 | 33.44                | 31.83                |
| 13 | 45.6                 | 34.6                 | 35.3                 | 31.6                 | 42.62                | 41.99                | 43.31                | 43.29                | 33.77                | 33.82                | 34.28                | 34.18                |
| 14 | 32.5                 | 22.7                 | 20.3                 | 21.8                 | 52.85                | 50.56                | 54.86                | 58.92                | 30.62                | 33.74                | 33.65                | 33.99                |
| 15 | 45.4                 | 31.2                 | 33                   | 37.7                 | 56.47                | 54.07                | 54.37                | 54.72                | 30.62                | 31.89                | 31.21                | 31.3                 |
| 16 | 32.4                 | 28.6                 | 28.4                 | 34.1                 | 55.96                | 56.19                | 55.8                 | 54.91                | 33.02                | 30.28                | 31.73                | 32.84                |
| 17 | 41.4                 | 32.5                 | 34.5                 | 32                   | 52.01                | 52                   | 52.19                | 52.03                | 31.88                | 33.85                | 32.46                | 33.44                |
| 18 | 38                   | 33.5                 | 30.6                 | 36.5                 | 50.13                | 52.67                | 52.04                | 52.67                | 32.89                | 31.94                | 33.33                | 30.96                |
